# Supplementary material
Source: PubMed Central journal article supplement (PMC6791469)
Supplement: Supp_Table1.pdf [file Supp_Table1.pdf]

## Supplementary Data

SUPPLEMENTARY TABLE S1. MEAN AND STANDARD DEVIATION COP, RMS\_COP, AND BODY WEIGHT SUPPORT PERCENTAGE VALUES ACROSS TRIALS FOR EACH DOG

| <i>Dog</i> | <i>OFS</i> | <i>Mean (SD) COP<sub>x</sub></i> | <i>Mean (SD) COP<sub>y</sub></i> | <i>Mean (SD) RMS_COP<sub>x</sub></i> | <i>Mean (SD) RMS-COP<sub>y</sub></i> | <i>Mean (SD) support</i> |
|------------|------------|----------------------------------|----------------------------------|--------------------------------------|--------------------------------------|--------------------------|
| 1          | 1          | -3.08 (0.18)                     | -2.07 (0.13)                     | 0.0189 (0.003)                       | 0.0297 (0.004)                       | 24.76 (3.6)              |
| 2          | 4          | 0.02 (0.05)                      | -3.60 (0.16)                     | 0.0469 (0.004)                       | 0.0298 (0.006)                       | 13.08 (6.7)              |
| 3          | 1          | 0.50 (0.29)                      | -7.64 (0.11)                     | 0.0188 (0.003)                       | 0.0437 (0.006)                       | 23.88 (0.5)              |
| 4          | 2          | -8.07 (0.21)                     | -9.62 (0.22)                     | 0.0203 (0.002)                       | 0.0249 (0.001)                       | 20.38 (0.9)              |
| 5          | 0          | -0.19 (0.16)                     | -4.00 (0.29)                     | 0.0407 (0.010)                       | 0.0282 (0.003)                       | 27.50 (3.0)              |
| 6          | 6          | 0.87 (0.32)                      | 4.84 (0.31)                      | 0.0302 (0.009)                       | 0.0308 (0.004)                       | 25.49 (2.6)              |
| 7          | 0          | 2.08 (0.37)                      | -3.06 (0.05)                     | 0.0331 (0.002)                       | 0.0366 (0.001)                       | 30.17 (0.7)              |
| 8          | 0          | -0.54 (0.36)                     | -3.97 (0.02)                     | 0.0196 (0.0006)                      | 0.0200 (0.0002)                      | 27.68 (0.2)              |
| 9          | 0          | NA                               | NA                               | 0.0229 (0.002)                       | 0.0233 (0.0008)                      | 23.812 (0.5)             |
| 10         | 4          | NA                               | NA                               | 0.0314 (0.002)                       | 0.0221 (0.001)                       | 25.13 (2.3)              |
| 11         | 6          | NA                               | NA                               | 0.0261 (0.002)                       | 0.0265 (0.005)                       | 24.32 (2.2)              |

Mean and standard deviation COP, RMS\_COP and body weight support percentage values across trials for each dog. OFS scores  $\geq 4$  correspond to taking at least some weight bearing steps.

OFS, open field scale; COP, center of pressure in the x (left-right) or y (craniocaudal) directions; RMS, root mean square; NA, not applicable; dogs in whom COP values were not available.
